# Supplementary material for: Conformation controlled turn on–turn off phosphorescence in a metal-free biluminophore: thriving the paradox that exists for organic compounds
Source: Royal Society of Chemistry journal article supplement (doi:10.1039/c6cp04336d), 2016-01-01

**Electronic Supplementary Information:**

Conformation controlled turn on–turn off  
phosphorescence in metal free biluminophore:  
Thriving the paradox that exists for organic  
compounds

*Ritika Joshi, Oinam Romesh Meitei<sup>†</sup>, Manojkumar Jadhao, Himank Kumar, and Sujit Kumar Ghosh\**

Department of Chemistry, Visvesvaraya National Institute of Technology, Nagpur,  
Maharashtra, 440010, India

<sup>†</sup>The present address of this author (O.R.M.) is as follows:

Lehrstuhl für Theoretische Chemie,  
Friedrich-Alexander Universität Erlangen-Nürnberg,  
Egerlandstraße 3, 91058 Erlangen, Germany

**Corresponding Author**

Dr. Sujit Kumar Ghosh, Department of Chemistry, Visvesvaraya National Institute of  
Technology, Nagpur, Maharashtra, PIN- 440010, India, e-mail: [sujitju@yahoo.co.in](mailto:sujitju@yahoo.co.in),  
[skghosh@chm.vnit.ac.in](mailto:skghosh@chm.vnit.ac.in), Phone no: +(91) 712 2801775, Fax: + (91) 712-2223230/2801357

**Scheme S1: Proposed possible reaction products of triplet state reaction of CBIQD upon “solid-state” dilution (a) Paterno-Buchi reaction to form oxetane (b) Insertion reaction to form benzazepinedione**

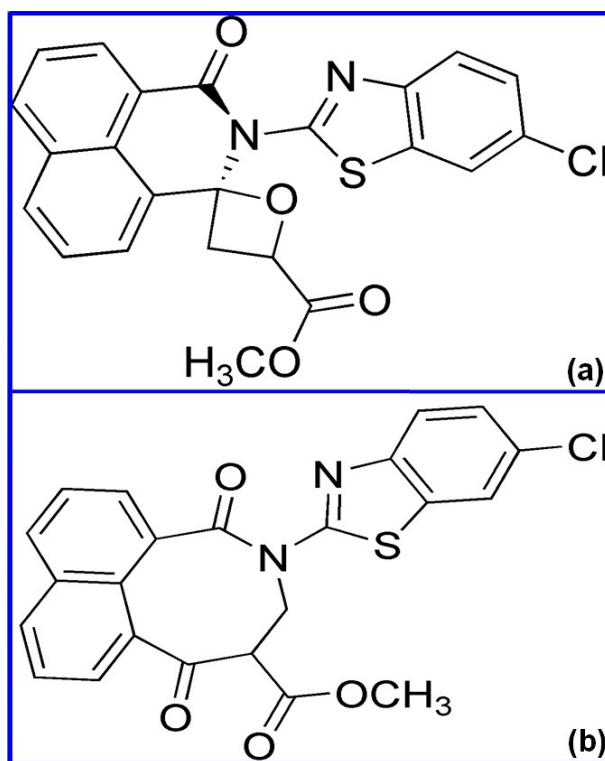

Supplement: c6cp04336d1.pdf [file c6cp04336d1.pdf]
